# Supplementary material
Source: publisher figshare collection journal article supplement (https://karger.figshare.com/ndownloader/files/17357930)
Supplement: Supplementary file 1 [file 17357930]

Online Suppl. Table S1

Baseline characteristics of the intention-to-treat population

|  | Total sample  N=254* | | SOMA-CBT  N=128 | | ENCERT  N=126* | | Between-group differences |
| --- | --- | --- | --- | --- | --- | --- | --- |
| Demographic variables | n | % | n | % | n | % |  |
| Sex (female) | 163 | 64.2% | 78 | 60.9% | 85 | 67.5% | Chi²(df=1, N=254)=1.18, p=.278 |
|  | M | SD | M | SD | M | SD |  |
| Age (in years) | 43.38 | 12.92 | 44.93 | 12.84 | 41.80 | 12.86 | t(252) = 1.94, p = .054 |
| Year of education | 14.55 | 2.94 | 14.47 | 2.85 | 14.63 | 3.03 | t(252) = -0.44, p = .663 |
|  | n | % | n | % | n | % |  |
| Main diagnosis (DSM-IV) |  |  |  |  |  |  | Chi”(df=2, N=254)=2.10, p=.351 |
| Somatisation disorder (300.81) | 55 | 21.7% | 26 | 20.3% | 29 | 23.0% |  |
| Undifferentiated somatoform disorder (300.82) | 144 | 56.6% | 70 | 54.7% | 74 | 58.7% |  |
| Somatoform pain disorder (307.8) | 55 | 21.7% | 32 | 25.0% | 23 | 18.3% |  |
| Number of comorbid mental disorders |  |  |  |  |  |  | Chi² (df=2,N=254)=2.36, p=.308 |
| Ø comorbid disorder | 126 | 49.6% | 66 | 51.6% | 60 | 47.6% |  |
| ≥ 1 comorbid disorder | 128 | 50.4% | 62 | 48.4% | 66 | 52.4% |  |
| ≥ 2 comorbid disorders | 36 | 14.2% | 21 | 16.4% | 15 | 11.9% |  |
| Comorbid anxiety disorder | 46 | 18.1% | 22 | 17.2% | 24 | 19.0% | Chi² (df=1,N=254)=0.15, p=.700 |
| Comorbid mood disorder | 94 | 37.0% | 48 | 37.5% | 46 | 36.5% | Chi² (df=1,N=254)=0.03, p=.870 |
| Comorbid personality disorder | 14 | 5.5% | 9 | 7.0% | 5 | 4.0% | Chi² (df=1,N=254)=1.14, p=.285 |
| Other comorbiditiesa | 12 | 4.7% | 7 | 5.5% | 5 | 4.0% | Chi² (df=1,N=254)=0.32, p=.573 |
|  | M | SD | M | SD | M | SD |  |
| Duration MUS (in years) | 7.20 | 7.85 | 7.77 | 8.13 | 6.61 | 7.54 | t(252)=1.18, p=.241 |
| Primary and secondary outcomes |  |  |  |  |  |  |  |
| Symptom severity (SOMS-7T) | 0.83 | 0.45 | 0.81 | 0.47 | 0.84 | 0.44 | t(252)=-0.48, p=.634 |
| Number of symptoms (MUS interview)b | 18.31 | 7.22 | 18.30 | 7.25 | 18.33 | 7.22 | t(252)=-0.04, p=.968 |
| Symptom disability (MUS interview)b | 57.81 | 25.06 | 57.27 | 25.82 | 58.35 | 24.34 | t(252)=-0.34, p=.733 |
| Psychological SSD criteria (MUS interview)b | 11.56 | 4.83 | 11.17 | 5.05 | 11.95 | 4.59 | t(252)=-1.37, p=.171 |
| Symptom severity (PHQ-15) | 12.76 | 4.13 | 12.62 | 4.16 | 12.90 | 4.11 | t(252)=-0.61, p=.541 |
| Symptom disability (mPDI) | 33.64 | 11.93 | 33.72 | 13.19 | 33.56 | 10.54 | t(242)=0.10, p=.917 |
| Health-related quality of life (EQ-5D) | 3.41 | 1.41 | 3.40 | 1.38 | 3.41 | 1.44 | t(250)=1.33, p=.186 |
| Health anxiety (mSHAI) | 29.69 | 13.47 | 28.06 | 13.13 | 31.33 | 13.37 | (252)=-1.95, p=.053 |
| Cognitive symptom coping (mPCQ) | 36.31 | 11.22 | 37.07 | 12.12 | 35.54 | 10.20 | t(246)=1.09, p=.277 |
| Behavioural symptom coping (mPCQ) | 31.55 | 9.64 | 32.98 | 10.21 | 30.09 | 8.83 | t(247)=2.42, p=.016 |
| Symptom distress (mPCQ) | 55.66 | 13.70 | 54.24 | 14.05 | 57.10 | 13.24 | t(252)=-1.67, p=.096 |
| Depressive symptoms (BDI-II) | 21.16 | 10.04 | 20.42 | 10.51 | 21.90 | 9.51 | t(252)=-1.18, p=.240 |
| General psychopathology (SCL-90-R GSI) | 0.91 | 0.54 | 0.85 | 0.53 | 0.96 | 0.54 | t(252)=-1.57, p=.118 |
| Number of GP visits (past 12 months) | 8.25 | 8.03 | 9.11 | 8.75 | 7.39 | 7.16 | t(250)=-0.25, p=.799 |
| Emotion regulation skills (ERSQ total score) | 1.87 | 0.69 | 1.95 | 0.65 | 1.78 | 0.73 | t(252)=1.96, p=.051 |
| Awareness (ERSQ) | 2.06 | 0.92 | 2.11 | 0.92 | 2.00 | 0.91 | t(252)=0.96, p=.340 |
| Sensations (ERSQ) | 2.13 | 0.92 | 2.19 | 0.87 | 2.06 | 0.96 | t(252)=1.14, p=.255 |
| Clarity (ERSQ) | 2.27 | 0.99 | 2.34 | 0.87 | 2.19 | 1.09 | t(236)=1.20, p=.232 |
| Understanding (ERSQ) | 1.84 | 0.96 | 1.93 | 0.89 | 1.76 | 1.02 | t(244)=1.40, p=.163 |
| Acceptance (ERSQ) | 1.79 | 0.91 | 1.94 | 0.85 | 1.64 | 0.95 | (252)=2.61, p=.010 |
| Resilience (ERSQ) | 1.55 | 0.97 | 1.70 | 0.95 | 1.39 | 0.97 | t(252)=2.60, p=.010 |
| Readiness to confront (ERSQ) | 1.95 | 0.95 | 1.94 | 0.94 | 1.95 | 0.97 | t(252)=-0.8, p=.936 |
| Compassionate self-support (ERSQ) | 1.91 | 0.95 | 2.01 | 0.92 | 1.82 | 0.98 | t(252)=1.54, p=.126 |
| Modification (ERSQ) | 1.29 | 0.81 | 1.39 | 0.81 | 1.20 | 0.81 | t(252)=1.83, p=.068 |

MUS=medically unexplained symptoms, DSM-IV=Diagnostic and Statistical Manual of Mental Disorders, 4th revision, SOMS-7T= Screening of Somatoform Disorders-7T, MUS interview=Clinician-rated interview for patients with medically unexplained symptoms, SSD=Somatic Symptom Disorder, PHQ-15=Patient Health Questionnaire-15, mPDI= modified Pain Disability Index, EQ-5D=EuroQuol-5D, mSHAI= modified version of the Short Health Anxiety Inventory, mCPQ= modified Coping Pain Questionnaire, BDI=Beck Depression Inventory, GSI=Global Severity Index, SCL-90-R=Symptom Checklist-90-Revised, GP=general practitioner, ERSQ= Emotion Regulation Skills Questionnaire.

*Data are not available for all randomised patients because one patient withdrew informed consent to add data to analyses.

aadjustment disorder, posttraumatic stress disorder, substance-related disorder, eating disorder, hyperkinetic disorder

bclinician-rated outcomes

Online Suppl. Table S2

Estimated change and cross-level-interaction in primary and secondary outcomes at the end of therapy and 6-month follow-up, based on intention-to-treat analysis

|  | SOMA-CBT  (N=128) |  | ENCERT  (N=126) |  | ENCERT versus SOMA-CBT |  |
| --- | --- | --- | --- | --- | --- | --- |
|  | Estimated change  [95% confidence interval]b | pb | Estimated change  [95% confidence interval]b | pb | CLIc  [95% confidence interval]b | pb |
| Symptom severity (SOMS-7T) |  |  |  |  |  |  |
| End of therapy | 0.31 [0.25 to +∞] | <0.0001 | 0.40 [0.31 to +∞] | <0.0001 | 0.09 [-0.001 to +∞] | 0.054 |
| 6-month follow-up | 0.33 [0.27 to +∞] | <0.0001 | 0.34 [0.25 to +∞] | <0.0001 | 0.01 [-0.08 to +∞] | 0.422 |
| Number of symptoms (MUS interview)a |  |  |  |  |  |  |
| End of therapy | 5.22 [4.12 to +∞] | <0.0001 | 5.23 [3.66 to +∞] | <0.0001 | 0.01 [-1.55 to +∞] | 0.494 |
| 6-month follow-up | 5.71 [4.52 to +∞] | <0.0001 | 5.48 [3.85 to +∞] | <0.0001 | -0.23 [-1.86 to +∞] | 0.408 |
| Symptom disability (MUS interview)a |  |  |  |  |  |  |
| End of therapy | 27.14 [21.84 to +∞] | <0.0001 | 26.14 [19.85 to +∞] | <0.0001 | -1.00 [-6.30 to +∞] | 0.402 |
| 6-month follow-up | 21.82 [16.47 to +∞] | <0.0001 | 25.32 [18.97 to +∞] | <0.0001 | 3.50 [-1.85 to +∞] | 0.131 |
| Psychological SSD criteria (MUS interview)a |  |  |  |  |  |  |
| End of therapy | 4.86 [4.10 to +∞] | <0.0001 | 6.09 [5.06 to +∞] | <0.0001 | **1.23 [0.20 to +∞]** | **0.025** |
| 6-month follow-up | 5.36 [4.51 to +∞] | <0.0001 | 6.28 [5.24 to +∞] | <0.0001 | 0.93 [-0.12 to +∞] | 0.072 |
| Symptom disability (mPDI) |  |  |  |  |  |  |
| End of therapy | 11.31 [8.83 to +∞] | <0.0001 | 13.73 [10.48 to +∞] | <0.0001 | 2.43 [-0.81 to +∞] | 0.109 |
| 6-month follow-up | 12.70 [10.30 to +∞] | <0.0001 | 13.86 [10.56 to +∞] | <0.0001 | 1.16 [-2.13 to +∞] | 0.281 |
| Symptom severity (PHQ-15) |  |  |  |  |  |  |
| End of therapy | 4.85 [4.09 to +∞] | <0.0001 | 5.66 [4.60 to +∞] | <0.0001 | 0.81 [-0.25 to +∞] | 0.104 |
| 6-month follow-up | 5.11 [4.41 to +∞] | <0.0001 | 5.08 [3.99 to +∞] | <0.0001 | -0.03 [-1.12 to +∞] | 0.483 |
| Health-related quality of life (EQ-5D) |  |  |  |  |  |  |
| End of therapy | 1.33 [1.07 to +∞] | <0.0001 | 1.36 [1.02 to +∞] | <0.0001 | 0.03 [-0.31 to +∞] | 0.435 |
| 6-month follow-up | 1.29 [1.03 to +∞] | <0.0001 | 1.24 [0.86 to +∞] | <0.0001 | -0.05 [-0.43 to +∞] | 0.424 |
| Health anxiety (mSHAI) |  |  |  |  |  |  |
| End of therapy | 9.15 [7.23 to +∞] | <0.0001 | 11.78 [9.25 to +∞] | <0.0001 | **2.63 [0.10 to +∞]** | **0.044** |
| 6-month follow-up | 8.92 [6.58 to +∞] | <0.0001 | 11.38 [8.54 to +∞] | <0.0001 | 2.47 [-0.37 to +∞] | 0.076 |
| Cognitive symptom coping (mCPQ) |  |  |  |  |  |  |
| End of therapy | 11.42 [9.40 to +∞] | <0.0001 | 13.43 [10.49 to +∞] | <0.0001 | 2.01 [-0.92 to +∞] | 0.130 |
| 6-month follow-up | 11.89 [9.76 to +∞] | <0.0001 | 14.80 [11.81 to +∞] | <0.0001 | 2.91 [-0.07 to +∞] | 0.054 |
| Behavioural symptom coping (mCPQ) |  |  |  |  |  |  |
| End of therapy | 7.84 [6.05 to +∞] | <0.0001 | 9.06 [6.70 to +∞] | <0.0001 | 1.22 [-1.13 to +∞] | 0.197 |
| 6-month follow-up | 6.61 [4.78 to +∞] | <0.0001 | 9.12 [6.68 to +∞] | <0.0001 | **2.51 [0.08 to +∞]** | **0.045** |
| Symptom distress (mCPQ) |  |  |  |  |  |  |
| End of therapy | 15.45 [12.97 to +∞] | <0.0001 | 19.43 [15.45 to +∞] | <0.0001 | **3.98 [0.64 to +∞]** | **0.025** |
| 6-month follow-up | 16.04 [13.35 to +∞] | <0.0001 | 17.19 [12.78 to +∞] | <0.0001 | 1.16 [-2.54 to +∞] | 0.304 |
| Depression (BDI) |  |  |  |  |  |  |
| End of therapy | 9.66 [8.26 to +∞] | <0.0001 | 11.09 [9.19 to +∞] | <0.0001 | 1.43 [-0.46 to +∞] | 0.106 |
| 6-month follow-up | 8.11 [6.35 to +∞] | <0.0001 | 9.60 [7.28 to +∞] | <0.0001 | 1.49 [-0.83 to +∞] | 0.145 |
| General psychopathology (SCL-90-R GSI) |  |  |  |  |  |  |
| End of therapy | 0.37 [0.30 to +∞] | <0.0001 | 0.49 [0.40 to +∞] | <0.0001 | **0.12 [0.02 to +∞]** | **0.019** |
| 6-month follow-up | 0.36 [0.29 to +∞] | <0.0001 | 0.43 [0.33 to +∞] | <0.0001 | 0.07 [-0.03 to +∞] | 0.122 |
| Number of GP visits (past 12 months) |  |  |  |  |  |  |
| End of therapy | --- | --- | --- | --- | --- | --- |
| 6-month follow-up | -2.57 [-5.84 to +∞] | 0.098 | -3.42 [-7.65 to +∞] | 0.021 | 0.85 [-3.36 to +∞] | 0.370 |
| Emotion regulation skills (ERSQ total score) |  |  |  |  |  |  |
| End of therapy | 0.50 [0.39 to +∞] | <0.0001 | 0.65 [0.48 to +∞] | <0.0001 | 0.15 [-0.02 to +∞] | 0.073 |
| 6-month follow-up | 0.53 [0.40 to +∞] | <0.0001 | 0.70 [0.51 to +∞] | <0.0001 | 0.17 [-0.02 to +∞] | 0.067 |
| Awareness (ERSQ) |  |  |  |  |  |  |
| End of therapy | 0.20 [0.05 to +∞] | 0.013 | 0.29 [0.08 to +∞] | 0.001 | 0.10 [-0.11 to +∞] | 0.218 |
| 6-month follow-up | 0.17 [0.003 to +∞] | 0.047 | 0.23 [-0.01 to +∞] | 0.013 | 0.06 [-0.17 to +∞] | 0.329 |
| Sensations (ERSQ) |  |  |  |  |  |  |
| End of therapy | 0.40 [0.26 to +∞] | <0.0001 | 0.44 [0.23 to +∞] | <0.0001 | 0.05 [-0.17 to +∞] | 0.364 |
| 6-month follow-up | 0.40 [0.23 to +∞] | <0.0001 | 0.51 [0.28 to +∞] | <0.0001 | 0.12 [-0.11 to +∞] | 0.203 |
| Clarity (ERSQ) |  |  |  |  |  |  |
| End of therapy | 0.25 [0.09 to +∞] | 0.004 | 0.44 [0.21 to +∞] | <0.0001 | 0.19 [-0.04 to +∞] | 0.091 |
| 6-month follow-up | 0.39 [0.21 to +∞] | <0.0001 | 0.59 [0.33 to +∞] | <0.0001 | 0.20 [-0.06 to +∞] | 0.108 |
| Understanding (ERSQ) |  |  |  |  |  |  |
| End of therapy | 0.50 [0.36 to +∞] | <0.0001 | 0.73 [0.51 to +∞] | <0.0001 | **0.23 [0.01 to +∞]** | **0.043** |
| 6-month follow-up | 0.68 [0.51 to +∞] | <0.0001 | 0.89 [0.65 to +∞] | <0.0001 | 0.21 [-0.04 to +∞] | 0.079 |
| Acceptance (ERSQ) |  |  |  |  |  |  |
| End of therapy | 0.58 [0.41 to +∞] | <0.0001 | 0.83 [0.59 to +∞] | <0.0001 | **0.25 [0.01 to +∞]** | **0.041** |
| 6-month follow-up | 0.62 [0.45 to +∞] | <0.0001 | 0.88 [0.63 to +∞] | <0.0001 | **0.26 [0.01 to +∞]** | **0.042** |
| Resilience (ERSQ) |  |  |  |  |  |  |
| End of therapy | 0.64 [0.48 to +∞] | <0.0001 | 0.91 [0.67 to +∞] | <0.0001 | **0.26 [0.02 to +∞]** | **0.036** |
| 6-month follow-up | 0.76 [0.58 to +∞] | <0.0001 | 0.99 [0.73 to +∞] | <0.0001 | 0.23 [-0.02 to +∞] | 0.066 |
| Readiness to confront (ERSQ) |  |  |  |  |  |  |
| End of therapy | 0.68 [0.52 to +∞] | <0.0001 | 0.63 [0.40 to +∞] | <0.0001 | -0.05 [-0.28 to +∞] | 0.362 |
| 6-month follow-up | 0.69 [0.52 to +∞] | <0.0001 | 0.63 [0.38 to +∞] | <0.0001 | -0.07 [-0.31 to +∞] | 0.334 |
| Compassionate self-support (ERSQ) |  |  |  |  |  |  |
| End of therapy | 0.52 [0.36 to +∞] | <0.0001 | 0.67 [0.42 to +∞] | <0.0001 | 0.14 [-0.10 to +∞] | 0.165 |
| 6-month follow-up | 0.45 [0.28 to +∞] | <0.0001 | 0.73 [0.49 to +∞] | <0.0001 | **0.29 [0.05 to +∞]** | **0.025** |
| Modification (ERSQ) |  |  |  |  |  |  |
| End of therapy | 0.78 [0.65 to +∞] | <0.0001 | 0.93 [0.72 to +∞] | <0.0001 | 0.15 [-0.06 to +∞] | 0.120 |
| 6-month follow-up | 0.67 [0.50 to +∞] | <0.0001 | 0.87 [0.64 to +∞] | <0.0001 | 0.20 [-0.03 to +∞] | 0.072 |

aclinician-rated outcomes

bone-tailed p-values and confidence intervals

cPositive values indicate a result in favour for ENCERT.

Figures in bold indicate statistically significant CLI (based on one-tailed p-value).

CLI=cross-level interaction.

MUS=medically unexplained symptoms, DSM-IV=Diagnostic and Statistical Manual of Mental Disorders, 4th revision, SOMS-7T= Screening of Somatoform Disorders-7T, MUS interview=Clinician-rated interview for patients with medically unexplained symptoms, SSD=Somatic Symptom Disorder, PHQ-15=Patient Health Questionnaire-15, mPDI= modified Pain Disability Index, EQ-5D=EuroQuol-5D, mSHAI= modified version of the Short Health Anxiety Inventory, mCPQ= modified Coping Pain Questionnaire, BDI=Beck Depression Inventory, GSI=Global Severity Index, SCL-90-R=Symptom Checklist-90-Revised, GP=general practitioner, ERSQ= Emotion Regulation Skills Questionnaire.

Online Suppl. Table S3

Responder rates (50% and 30% criterion) and rates of deterioration or no change at the end of therapy and 6-month follow-up in ENCERT and SOMA-CBT

|  | End of therapy |  |  | 6-month follow-up | | |
| --- | --- | --- | --- | --- | --- | --- |
|  | Symptom improvement  ≥ 50% | Symptom improvement  ≥ 30% | No change/ deterioration | Symptom improvement  ≥ 50% | Symptom improvement  ≥ 30% | No change/ deterioration |
| ENCERT | 45.7%  (n=58) | 59.1%  (n=79) | 10.2%  (n=13) | 32.3%  (n=41) | 44.1%  (n=56) | 12.6%  (n=16) |
| SOMA-CBT | 31.3 %  (n=40) | 48.4%  (n=62) | 12.5%  (n=16) | 31.3%  (n=40) | 45.3%  (n=58) | 11.7%  (n=15) |
| Test statistics | Chi²(1,N=207)  =5.33, p=0.015 | Chi²(1,N=207)  =2.62, p=0.070 | Chi²(1,N=207)  =0.47, p=0.314 | Chi²(1,N=177)  =0.07, p=0.528 | Chi²(1,N=177)  =0.17, p=0.398 | Chi²(1,N=177)  =0.03, p=0.514 |

Online Suppl. Table S4

Frequency of negative effects from the Inventory for the Assessment of Negative Effects of Psychotherapy (INEP) per item in the ENCERT and SOMA-CBT group.

|  | SOMA-CBT  n=103 |  | ENCERT  n=103 |  | Difference between groups |
| --- | --- | --- | --- | --- | --- |
| Negative effects of psychotherapy (INEP items 1-15) |  |  |  |  |  |
| 1. I feel worse. | 0 | 0.0% | 2 | 1.9% | Chi²(1)=2.02, p=.498 |
| 2. Trusting others comes harder. | 0 | 0.0% | 0 | 0.0% | na |
| 3. I am more troubled by my past. | 1 | 1.0% | 3 | 2.9% | Chi²(1)=1.00, p=.621 |
| 4. My partner and I experience more conflicts. | 3 | 2.9% | 6 | 5.8% | Chi²(1)=0.85, p=.499 |
| 5. The relationship with my family has worsened. | 2 | 1.9% | 3 | 2.9% | Chi²(1)=0.20, p=1.000 |
| 6. The relationship with my friends has worsened. | 2 | 1.9% | 1 | 1.0% | Chi²(1)=0.36, p=.620 |
| 7. I am anxious that my colleagues or friends could find out about my psychotherapy. | 5 | 4.9% | 6 | 5.8% | Chi²(1)=0.11, p=.768 |
| 8. I have troubles finding insurance or am anxious to apply for new insurance. | 5 | 4.9% | 8 | 7.8% | Chi²(1)=0.77, p=.407 |
| 9. I have more financial worries than before. | 2 | 1.9% | 3 | 2.9% | Chi²(1)=0.22, p=.683 |
| 10. I feel addicted to my therapist. | 8 | 7.8% | 10 | 9.7% | Chi²(1)=0.24, p=.806 |
| 11. I have troubles making important decisions without my therapist. | 8 | 7.8% | 3 | 2.9% | Chi²(1)=2.40, p=.214 |
| 12. My partner is or has been jealous of my therapist. | 2 | 1.9% | 2 | 1.9% | Chi²(1)=0.01, p=1.000 |
| 13. Everybody has ups and downs. During or just before the end of my therapy to I have experienced more downs. | 6 | 5.8% | 6 | 5.8% | Chi²(1)=0.01, p=1.000 |
| 14. I have changed for the worse. | 0 | 0.0% | 1 | 1.0% | Chi²(1)=1.00, p=1.000 |
| 15. During or just before the end of my therapy to I suffered from suicidal thoughts or intentions for the first time ever. | 0 | 0.0% | 0 | 0.0% | na |
| # patients reporting ≥ 1 negative therapy effect | 34 | 33.0% | 28 | 27.2% | Chi²(1)=0.75, p=0.449 |
| Average # negative therapy effects | 0.43 | 0.88 | 0.52 | 0.95 | t(203)=-0.73, p=0.469 |
| Intensity score negative therapy effects | 0.53 | 1.13 | 0.72 | 1.45 | t(194)=-1.04, p=0.301 |
| Malpractice and therapists’ unethical behaviour (INEP item 16-21) |  |  |  |  |  |
| 16. I felt hurt by what the therapist told me. | 2 | 1.9% | 3 | 2.9% | Chi²(1)=0.21, p=1.000 |
| 17. I felt personally ridiculed by my therapist. | 0 | 0.0% | 0 | 0.0% | na |
| 18. I felt sexually molested by my therapist. | 0 | 0.0% | 0 | 0.0% | na |
| 19. My therapist attacked me physically. | 0 | 0.0% | 0 | 0.0% | na |
| 20. My therapist forced me to do things I did not want to do (e.g. to confrontations to role plays). | 1 | 1.0% | 0 | 0.0% | Chi²(1)=1.01, p=1.000 |
| 21. My therapist broke confidentiality | 0 | 0.0% | 0 | 0.0% | na |
| Total # therapists’ misbehaviour | 3 | 2.9% | 3 | 2.9% | Chi²(1)=0.00, p=1.000 |

Data are n/N (%) to or mean/SD.

na=not applicable
